# Supplementary material for: Gait parameters associated with hallux valgus: a systematic review
Source: J Foot Ankle Res. 2013 Mar 12;6:9. doi: 10.1186/1757-1146-6-9 (PMC3602054; doi:10.1186/1757-1146-6-9)
Supplement: Additional file 1 — Results from quality assessment using the Epidemiological Appraisal Instrument (9 included studies). [file 1757-1146-6-9-S1.xlsx]

## Sheet: Sheet1
Additional File 1. Results from quality assessment using the Epidemiological Appraisal Instrument (9 included studies)
Study ID	Reference number	Q1. Reported study aim/objective clearly	Q2. Associated factors clearly defined	Q3. HV clearly defined	Q4. Reported study design	Q5. Reported sampling frame	Q6. Reported inclusion criteria	Q7. Reported participation rate	Q8. Reported sample characteristics	Q9. Reported statistical methods	Q10. Reported all basic data	Q11. Reported variability in data	Q12. Reported statistical parameters	Q13. Sample size calculations	Q14. Comparability of case/control groups	Q15. Adequate participation rate	Q16. Recruitment period for case/control groups	Q17. Non-responder characteristics described	Q18. Reliability of all associated factors	Q19. Validity of all associated factors	Q20. Standardised assessment of associated factors	Q21. Blinding of assessors	Q22. Reliability of HV assessment	Q23. Validity of HV assessment	Q24. Standardised assessment of HV	Q25. Assessment period for case/control groups	Q26. Collected data on HV severity/symptoms	Q27. Adjusted for covariates (sex and age)	Q28. Reported data for ≥3 levels of associated factors	Q29. Reported data for subgroups of subjects (e.g. by gender or age)	Q30. Generalisability of results to study population (participation rate)	Q31. Generalisability of results to other populations (random sampling)	Overall quality score (range 0 to 2)
Bryant 2000	[53]	1	2	1			1		1	2	1	1							1				1	1			2						0.68
Deschamps 2010	[54]	1	1	2	1	2	1		1	2	1	1			2		1				1						2					2	0.77
Kadono 2003	[55]	1	1	1		2	2		1	2	1	1			2						1			1			2						0.68
Martinez-Nova 2010	[56]	1	2	1	2		1		1	1	1	1	1						2					1			1	1					0.81
Menz 2005	[57]	1	1	2		2	1		1	1	1	2			-		-		2			-	1			-	2	1				2	0.81
Mickle 2011	[58]														-		-					-				-							0.89
Shimazaki 1981	[59]	2	2	2			1		1		2	2												1			2						0.39
Taranto 2007	[60]	1	1	1	1	2	1		1	2	1	1	1		1				1	1	1		1	1	1		2		1				1.19
Tokita 1991	[61]	2	2	2					1		2	2															2						0.26
Studies scoring Yes		7	5	4	2	0	7	0	9	3	6	5	2	0	1	0	1	0	2	1	3	0	3	5	2	0	1	3	1	0	0	1
Abbreviations: HV, hallux valgus
Black shading = “Yes”, Grey shading = “Partial”, White (no shading) = “No” or “Unable to determine”, “-” = “Not applicable”
