# Supplementary material for: Gait parameters associated with hallux valgus: a systematic review
Source: J Foot Ankle Res. 2013 Mar 12;6:9. doi: 10.1186/1757-1146-6-9 (PMC3602054; doi:10.1186/1757-1146-6-9)
Supplement: Additional file 2 — Selected characteristics of included studies. [file 1757-1146-6-9-S2.xlsx]

## Sheet: Sheet1
Additional File 2. Selected characteristics of included studies
Study ID/ country	Reference number	Study aim	Study design/ methodology	Definition HV	Selection criteria	Characteristics of gait investigated
Bryant 2000; Australia	[53]	To analyse plantar pressure distribution in patients with HV and hallux limitus compared to controls	CC/ plantar pressure study	Radiographic HV angle > 20°	HV group: patients from 3 private podiatry practices, included if signs/symptoms to warrant corrective surgery; excluded if history of previous related foot surgery or inflammatory joint disease; Control group: excluded if clinical symptoms/radiological signs of HV, obvious musculoskeletal abnormality of lower limb, foot surgery, or significant injury past 12 months	Peak plantar pressures: heel, midfoot, metatarsal heads, hallux, lesser digits
Deschamps 2010; Belgium	[54]	To investigate foot kinematics in patients with HV compared to controls	CC/ gait analysis	Manchester Scale; HV group: moderate/severe; Controls: no deformity	HV group: HV patients from a hospital foot and ankle department; with good peripheral pulses and adequate sensation; Control group: recruited through advertisements at the same hospital; no history of lower limb trauma, foot deformity, or systemic neurological disorder	Gait cycle, stance and swing durations; Relative intersegmental motion (in each of 7 phases of gait): hallux-forefoot, forefoot-hindfoot, hindfoot-tibia, forefoot-tibia; Also presented graphs for mean intersegmental angles throughout entire gait cycle
Kadono 2003; Japan	[55]	To examine forefoot plantar pressure distribution during walking in patients with HV compared to controls	CC/ plantar pressure study	Radiographic HV angle ≥ 20°	HV group: patients admitted for HV surgery; Control group: no pain or symptoms of hallux deformity	Plantar pressures: metatarsal heads, fibular sesamoid, hallux, lesser digits
Martinez-Nova 2010; Spain	[56]	To determine the magnitude and distribution of forefoot plantar pressure in participants with mild HV compared to controls	CC/ plantar pressure study	HV group: radiographic HV angle 15-30° and intermetatarsal angle ≤13°; Control group: visual observation of no deformity	HV group: female patients with bilateral mild HV, pain over medial eminence related to shoe-wearing; no evidence of OA and no pathology of the lesser toes; Control group: age-matched females with no history of significant foot or lower-limb problems during the previous 12 months	Contact time, cadence; mean plantar pressures: metatarsal heads, hallux, lesser digits
Menz 2005; Australia	[57]	To determine the contribution of HV to impaired gait patterns in elderly people	CS/ gait analysis	Visual observation of HV angle <15° (mild), 15-45° (moderate), or >45° (severe); collapsed into dichotomous categories for analysis (none/mild versus moderate/severe)	Adults aged ≥75 years who were part of a larger randomized controlled trial; Exclusion criteria: Parkinson's disease, cognitive impairment	Gait velocity, cadence, step length, harmonic ratio (head and pelvis)
Mickle 2011; Australia	[58]	To evaluate gait, balance and foot function in older people with hallux valgus and lesser toe deformities and determine whether these factors differed to otherwise healthy older people without toe deformities	CS/ gait analysis, plantar pressure, balance assessment	Manchester Scale; HV group: moderate/severe; Control group: none/mild	Adults aged >60 years, living independently in the community, passed Short Portable Mental Status Questionnaire, able to ambulate for at least 10 m with or without an aid, free from neurological diseases and able to arrange their own transport to testing venue	Spatio-temporal gait parameters: speed, step and stride length, step width, swing phase, stance phase, and double support duration, angle of gait; Peak plantar pressures and pressure-time integral: heel, midfoot, metatarsal heads, hallux, lesser digits
Shimazaki 1981; Japan	[59]	To conduct electromyographic analysis of intrinsic muscles around the hallux and plantar pressures under the hallux when walking in HV subjects compared to controls	CC/ electromyo-graphic and plantar pressure study	Radiographic HV angle 20-35° (mild HV) or >35° (severe HV)	Exclusion criteria: HV secondary to rheumatoid arthritis, gout or other diseases of the hip and knee joints	Hallux plantar pressures; dynamic electromyography of intrinsic muscles (insufficient data)
Taranto 2007; Australia	[60]	To determine the relationship between HV (and hallux limitus) and angle of gait, (in addition to several other radiographic angular and linear parameters)	CC/ gait analysis	Radiographic HV angle > 20°	Patients recruited from a private podiatry practice; Exclusion criteria: history of lower limb surgery or trauma, neurologic disorders, gait abnormalities, or use of walking aids, history of congenital hip dysplasia, systemic disease, or hypermobility syndromes	Angle of gait
Tokita 1991; Japan	[61]	To compare plantar pressure measurements in HV subjects compared to controls	CC/ plantar pressure study	Radiographic HV angle > 20°	NR	Dynamic plantar pressures: distribution of centre of pressure
Abbreviations: HV, hallux valgus; CS, cross-sectional; CC, case control; NR, not reported
